# Supplementary material for: LncRNA PELATON, a Ferroptosis Suppressor and Prognositic Signature for GBM
Source: Front Oncol. 2022 Apr 28;12:817737. doi: 10.3389/fonc.2022.817737 (PMC9097896; doi:10.3389/fonc.2022.817737)
Supplement: Supplementary file 6 [file Table_1.xls]

#please cite:
#Zhou KR, Liu S, Cai L, et al. ENCORI: The Encyclopedia of RNA Interactomes.
#2.Li JH, et al.starBase v2.0: decoding miRNA-ceRNA, miRNA-ncRNA and protein-RNA interaction networks from large-scale CLIP-Seq data , Nucleic Acids Res. 2014 Jan;42:D92-7.
RBP	geneID	geneName	geneType	clusterNum	clipExpNum	clipIDnum	HepG2	K562	pancancerNum
ADAR	ENSG00000224397	SMIM25	lincRNA	1	1	1	NA	NA	15
DKC1	ENSG00000224397	SMIM25	lincRNA	1	1	1	NA	NA	17
EIF4A3	ENSG00000224397	SMIM25	lincRNA	1	1	1	NA	NA	20
EWSR1	ENSG00000224397	SMIM25	lincRNA	1	1	1	NA	NA	12
PTBP1	ENSG00000224397	SMIM25	lincRNA	1	1	1	NA	NA	13
SRSF1	ENSG00000224397	SMIM25	lincRNA	1	1	1	NA	NA	13
SRSF10	ENSG00000224397	SMIM25	lincRNA	1	1	1	NA	NA	17
TAF15	ENSG00000224397	SMIM25	lincRNA	2	2	2	NA	NA	8
UPF1	ENSG00000224397	SMIM25	lincRNA	1	1	1	NA	NA	13
YTHDC1	ENSG00000224397	SMIM25	lincRNA	1	1	1	NA	NA	19
