# Supplementary material for: LncRNA PELATON, a Ferroptosis Suppressor and Prognositic Signature for GBM
Source: Front Oncol. 2022 Apr 28;12:817737. doi: 10.3389/fonc.2022.817737 (PMC9097896; doi:10.3389/fonc.2022.817737)
Supplement: Supplementary file 7 [file Table_2.xlsx]

## Sheet: 与P53结合的RBP
#please cite:
#Zhou KR, Liu S, Cai L, et al. ENCORI: The Encyclopedia of RNA Interactomes.
#2.Li JH, et al.starBase v2.0: decoding miRNA-ceRNA, miRNA-ncRNA and protein-RNA interaction networks from large-scale CLIP-Seq data , Nucleic Acids Res. 2014 Jan;42:D92-7.
RBP	geneID	geneName	tissue	diseaseNum	diseases	cosmicNum	sampleNum	mutTypeNum	clipExpNum	clipNum
ADAR	ENSG00000141510	TP53	breast	2	phyllodes tumour,carcinoma	2	2	2	2	3
AIFM1	ENSG00000141510	TP53	breast	7	ductal carcinoma,ER-PR-positive carcinoma,HER-positive carcinoma,hyperplasia,phyllodes tumour,basal (triple-negative) carcinoma,carcinoma	27	22	7	2	3
AUH	ENSG00000141510	TP53	breast	5	ER-positive carcinoma,luminal NS carcinoma,phyllodes tumour,basal (triple-negative) carcinoma,carcinoma	5	6	2	1	2
BCCIP	ENSG00000141510	TP53	breast	14	ductal carcinoma,ER-HER-positive carcinoma,ER-positive carcinoma,ER-PR-positive carcinoma,HER-positive carcinoma,lobular carcinoma,luminal B carcinoma,luminal NS carcinoma,medullary carcinoma,metaplastic carcinoma,neoplasm,phyllodes tumour,basal (triple-negative) carcinoma,carcinoma	39	42	8	1	2
BUD13	ENSG00000141510	TP53	breast	21	ductal carcinoma,ductolobular carcinoma,ER-positive carcinoma,ER-PR-HER-positive carcinoma,ER-PR-positive carcinoma,fibroadenoma,HER-positive carcinoma,hyperplasia,lobular carcinoma,luminal A carcinoma,luminal B carcinoma,luminal NS carcinoma,adenosis,medullary carcinoma,metaplastic carcinoma,neoplasm,phyllodes tumour,basal (triple-negative) carcinoma,acinic cell carcinoma,carcinoma,carcinoma in …	355	385	12	2	10
CAPRIN1	ENSG00000141510	TP53	breast	15	ductal carcinoma,ductolobular carcinoma,ER-positive carcinoma,ER-PR-HER-positive carcinoma,ER-PR-positive carcinoma,HER-positive carcinoma,lobular carcinoma,luminal NS carcinoma,adenosis,metaplastic carcinoma,neoplasm,phyllodes tumour,basal (triple-negative) carcinoma,carcinoma,carcinoma in situ	172	168	9	1	2
CNBP	ENSG00000141510	TP53	breast	18	ductal carcinoma,ductolobular carcinoma,ER-HER-positive carcinoma,ER-positive carcinoma,ER-PR-HER-positive carcinoma,ER-PR-positive carcinoma,HER-positive carcinoma,lobular carcinoma,luminal B carcinoma,luminal NS carcinoma,medullary carcinoma,metaplastic carcinoma,neoplasm,phyllodes tumour,basal (triple-negative) carcinoma,acinic cell carcinoma,carcinoma,carcinoma in situ	180	173	8	1	5
CSTF2T	ENSG00000141510	TP53	breast	18	ductal carcinoma,ductolobular carcinoma,ER-HER-positive carcinoma,ER-positive carcinoma,ER-PR-HER-positive carcinoma,ER-PR-positive carcinoma,fibroadenoma,adenoid cystic carcinoma,HER-positive carcinoma,hyperplasia,lobular carcinoma,luminal NS carcinoma,medullary carcinoma,metaplastic carcinoma,neoplasm,phyllodes tumour,basal (triple-negative) carcinoma,carcinoma	507	426	10	2	6
DDX3X	ENSG00000141510	TP53	breast	11	ductal carcinoma,ER-positive carcinoma,ER-PR-positive carcinoma,fibroadenoma,HER-positive carcinoma,lobular carcinoma,luminal NS carcinoma,neoplasm,phyllodes tumour,basal (triple-negative) carcinoma,carcinoma	85	67	8	1	1
DDX54	ENSG00000141510	TP53	breast	23	ductal carcinoma,ductolobular carcinoma,ER-HER-positive carcinoma,ER-positive carcinoma,ER-PR-HER-positive carcinoma,ER-PR-positive carcinoma,fibroadenoma,adenoid cystic carcinoma,HER-positive carcinoma,hyperplasia,lobular carcinoma,luminal A carcinoma,luminal B carcinoma,luminal NS carcinoma,adenosis,medullary carcinoma,metaplastic carcinoma,neoplasm,phyllodes tumour,basal (triple-negative) carc…	1361	1257	12	5	28
DGCR8	ENSG00000141510	TP53	breast	16	ductal carcinoma,ductolobular carcinoma,ER-HER-positive carcinoma,ER-positive carcinoma,ER-PR-positive carcinoma,HER-positive carcinoma,lobular carcinoma,luminal B carcinoma,luminal NS carcinoma,medullary carcinoma,metaplastic carcinoma,neoplasm,phyllodes tumour,basal (triple-negative) carcinoma,acinic cell carcinoma,carcinoma	235	241	10	5	10
DHX9	ENSG00000141510	TP53	breast	2	phyllodes tumour,carcinoma	2	2	2	3	4
DKC1	ENSG00000141510	TP53	breast	2	phyllodes tumour,carcinoma	2	2	2	1	1
EIF4A3	ENSG00000141510	TP53	breast	22	ductal carcinoma,ductolobular carcinoma,ER-HER-positive carcinoma,ER-positive carcinoma,ER-PR-HER-positive carcinoma,ER-PR-positive carcinoma,fibroadenoma,HER-positive carcinoma,hyperplasia,lobular carcinoma,luminal A carcinoma,luminal B carcinoma,luminal NS carcinoma,adenosis,medullary carcinoma,metaplastic carcinoma,neoplasm,phyllodes tumour,basal (triple-negative) carcinoma,acinic cell carcino…	988	948	12	2	17
ELAVL1	ENSG00000141510	TP53	breast	22	ductal carcinoma,ductolobular carcinoma,ER-HER-positive carcinoma,ER-positive carcinoma,ER-PR-HER-positive carcinoma,ER-PR-positive carcinoma,fibroadenoma,HER-positive carcinoma,hyperplasia,lobular carcinoma,luminal A carcinoma,luminal B carcinoma,luminal NS carcinoma,adenosis,medullary carcinoma,metaplastic carcinoma,neoplasm,phyllodes tumour,basal (triple-negative) carcinoma,acinic cell carcino…	1261	1198	11	4	20
FBL	ENSG00000141510	TP53	breast	22	ductal carcinoma,ductolobular carcinoma,ER-HER-positive carcinoma,ER-positive carcinoma,ER-PR-HER-positive carcinoma,ER-PR-positive carcinoma,fibroadenoma,HER-positive carcinoma,hyperplasia,lobular carcinoma,luminal A carcinoma,luminal B carcinoma,luminal NS carcinoma,adenosis,medullary carcinoma,metaplastic carcinoma,neoplasm,phyllodes tumour,basal (triple-negative) carcinoma,acinic cell carcino…	1288	1220	12	2	18
FMR1	ENSG00000141510	TP53	breast	23	ductal carcinoma,ductolobular carcinoma,ER-HER-positive carcinoma,ER-positive carcinoma,ER-PR-HER-positive carcinoma,ER-PR-positive carcinoma,fibroadenoma,adenoid cystic carcinoma,HER-positive carcinoma,hyperplasia,lobular carcinoma,luminal A carcinoma,luminal B carcinoma,luminal NS carcinoma,adenosis,medullary carcinoma,metaplastic carcinoma,neoplasm,phyllodes tumour,basal (triple-negative) carc…	1518	1412	12	6	40
FUS	ENSG00000141510	TP53	breast	7	ductal carcinoma,ductolobular carcinoma,HER-positive carcinoma,medullary carcinoma,phyllodes tumour,basal (triple-negative) carcinoma,carcinoma	50	39	6	2	2
FXR2	ENSG00000141510	TP53	breast	14	ductal carcinoma,ductolobular carcinoma,ER-positive carcinoma,ER-PR-positive carcinoma,HER-positive carcinoma,lobular carcinoma,luminal NS carcinoma,medullary carcinoma,metaplastic carcinoma,neoplasm,phyllodes tumour,basal (triple-negative) carcinoma,acinic cell carcinoma,carcinoma	127	114	9	1	2
GTF2F1	ENSG00000141510	TP53	breast	7	ductal carcinoma,ER-positive carcinoma,luminal NS carcinoma,metaplastic carcinoma,phyllodes tumour,basal (triple-negative) carcinoma,carcinoma	17	18	4	2	3
HNRNPA1	ENSG00000141510	TP53	breast	10	ductal carcinoma,ER-PR-positive carcinoma,HER-positive carcinoma,lobular carcinoma,luminal NS carcinoma,medullary carcinoma,phyllodes tumour,basal (triple-negative) carcinoma,carcinoma,carcinoma in situ	34	31	7	4	6
HNRNPA2B1	ENSG00000141510	TP53	breast	16	ductal carcinoma,ductolobular carcinoma,ER-HER-positive carcinoma,ER-positive carcinoma,ER-PR-positive carcinoma,HER-positive carcinoma,lobular carcinoma,luminal NS carcinoma,adenosis,medullary carcinoma,metaplastic carcinoma,neoplasm,phyllodes tumour,basal (triple-negative) carcinoma,acinic cell carcinoma,carcinoma	140	150	10	1	2
HNRNPC	ENSG00000141510	TP53	breast	2	phyllodes tumour,carcinoma	2	2	2	4	12
HNRNPK	ENSG00000141510	TP53	breast	11	ductal carcinoma,ER-positive carcinoma,ER-PR-positive carcinoma,HER-positive carcinoma,hyperplasia,lobular carcinoma,luminal NS carcinoma,medullary carcinoma,phyllodes tumour,basal (triple-negative) carcinoma,carcinoma	95	80	8	3	3
HNRNPUL1	ENSG00000141510	TP53	breast	6	ductal carcinoma,ductolobular carcinoma,lobular carcinoma,phyllodes tumour,carcinoma,carcinoma in situ	18	14	5	1	1
IGF2BP1	ENSG00000141510	TP53	breast	23	ductal carcinoma,ductolobular carcinoma,ER-HER-positive carcinoma,ER-positive carcinoma,ER-PR-HER-positive carcinoma,ER-PR-positive carcinoma,fibroadenoma,adenoid cystic carcinoma,HER-positive carcinoma,hyperplasia,lobular carcinoma,luminal A carcinoma,luminal B carcinoma,luminal NS carcinoma,adenosis,medullary carcinoma,metaplastic carcinoma,neoplasm,phyllodes tumour,basal (triple-negative) carc…	1018	922	13	3	14
IGF2BP2	ENSG00000141510	TP53	breast	23	ductal carcinoma,ductolobular carcinoma,ER-HER-positive carcinoma,ER-positive carcinoma,ER-PR-HER-positive carcinoma,ER-PR-positive carcinoma,fibroadenoma,adenoid cystic carcinoma,HER-positive carcinoma,hyperplasia,lobular carcinoma,luminal A carcinoma,luminal B carcinoma,luminal NS carcinoma,adenosis,medullary carcinoma,metaplastic carcinoma,neoplasm,phyllodes tumour,basal (triple-negative) carc…	1328	1222	13	6	64
IGF2BP3	ENSG00000141510	TP53	breast	20	ductal carcinoma,ductolobular carcinoma,ER-HER-positive carcinoma,ER-positive carcinoma,ER-PR-HER-positive carcinoma,ER-PR-positive carcinoma,fibroadenoma,HER-positive carcinoma,hyperplasia,lobular carcinoma,luminal A carcinoma,luminal NS carcinoma,medullary carcinoma,metaplastic carcinoma,neoplasm,phyllodes tumour,basal (triple-negative) carcinoma,acinic cell carcinoma,carcinoma,carcinoma in situ	877	827	12	4	11
ILF3	ENSG00000141510	TP53	breast	2	phyllodes tumour,carcinoma	2	2	2	1	1
KHSRP	ENSG00000141510	TP53	breast	2	phyllodes tumour,carcinoma	2	2	2	2	4
LARP4B	ENSG00000141510	TP53	breast	10	ductal carcinoma,ductolobular carcinoma,HER-positive carcinoma,lobular carcinoma,luminal NS carcinoma,medullary carcinoma,phyllodes tumour,basal (triple-negative) carcinoma,acinic cell carcinoma,carcinoma	100	82	10	1	2
LARP7	ENSG00000141510	TP53	breast	2	phyllodes tumour,carcinoma	2	2	2	1	1
LIN28	ENSG00000141510	TP53	breast	22	ductal carcinoma,ductolobular carcinoma,ER-HER-positive carcinoma,ER-positive carcinoma,ER-PR-HER-positive carcinoma,ER-PR-positive carcinoma,fibroadenoma,adenoid cystic carcinoma,HER-positive carcinoma,hyperplasia,lobular carcinoma,luminal A carcinoma,luminal B carcinoma,luminal NS carcinoma,medullary carcinoma,metaplastic carcinoma,neoplasm,phyllodes tumour,basal (triple-negative) carcinoma,aci…	441	443	11	2	8
LIN28A	ENSG00000141510	TP53	breast	13	ductal carcinoma,ductolobular carcinoma,ER-positive carcinoma,ER-PR-positive carcinoma,HER-positive carcinoma,lobular carcinoma,medullary carcinoma,metaplastic carcinoma,neoplasm,phyllodes tumour,basal (triple-negative) carcinoma,acinic cell carcinoma,carcinoma	113	100	10	1	2
LIN28B	ENSG00000141510	TP53	breast	22	ductal carcinoma,ductolobular carcinoma,ER-HER-positive carcinoma,ER-positive carcinoma,ER-PR-HER-positive carcinoma,ER-PR-positive carcinoma,fibroadenoma,adenoid cystic carcinoma,HER-positive carcinoma,hyperplasia,lobular carcinoma,luminal A carcinoma,luminal B carcinoma,luminal NS carcinoma,medullary carcinoma,metaplastic carcinoma,neoplasm,phyllodes tumour,basal (triple-negative) carcinoma,aci…	387	393	11	3	8
METTL14	ENSG00000141510	TP53	breast	9	ductal carcinoma,ductolobular carcinoma,HER-positive carcinoma,lobular carcinoma,medullary carcinoma,phyllodes tumour,basal (triple-negative) carcinoma,acinic cell carcinoma,carcinoma	73	60	8	2	2
METTL3	ENSG00000141510	TP53	breast	7	ductal carcinoma,ductolobular carcinoma,HER-positive carcinoma,medullary carcinoma,phyllodes tumour,basal (triple-negative) carcinoma,carcinoma	43	36	6	1	1
MOV10	ENSG00000141510	TP53	breast	16	ductal carcinoma,ER-positive carcinoma,ER-PR-HER-positive carcinoma,ER-PR-positive carcinoma,HER-positive carcinoma,hyperplasia,lobular carcinoma,luminal NS carcinoma,medullary carcinoma,metaplastic carcinoma,neoplasm,phyllodes tumour,basal (triple-negative) carcinoma,acinic cell carcinoma,carcinoma,carcinoma in situ	121	120	10	3	22
MSI2	ENSG00000141510	TP53	breast	9	ductal carcinoma,ER-positive carcinoma,ER-PR-positive carcinoma,HER-positive carcinoma,hyperplasia,luminal NS carcinoma,phyllodes tumour,basal (triple-negative) carcinoma,carcinoma	34	28	7	2	4
NOP56	ENSG00000141510	TP53	breast	12	ductal carcinoma,ER-HER-positive carcinoma,ER-positive carcinoma,HER-positive carcinoma,luminal NS carcinoma,adenosis,medullary carcinoma,neoplasm,phyllodes tumour,basal (triple-negative) carcinoma,acinic cell carcinoma,carcinoma	86	84	10	1	4
NOP58	ENSG00000141510	TP53	breast	21	ductal carcinoma,ductolobular carcinoma,ER-HER-positive carcinoma,ER-positive carcinoma,ER-PR-HER-positive carcinoma,ER-PR-positive carcinoma,fibroadenoma,HER-positive carcinoma,hyperplasia,lobular carcinoma,luminal A carcinoma,luminal NS carcinoma,adenosis,medullary carcinoma,metaplastic carcinoma,neoplasm,phyllodes tumour,basal (triple-negative) carcinoma,acinic cell carcinoma,carcinoma,carcino…	594	550	13	2	19
PCBP2	ENSG00000141510	TP53	breast	13	ductal carcinoma,ductolobular carcinoma,ER-positive carcinoma,ER-PR-HER-positive carcinoma,ER-PR-positive carcinoma,lobular carcinoma,luminal NS carcinoma,medullary carcinoma,metaplastic carcinoma,neoplasm,phyllodes tumour,basal (triple-negative) carcinoma,carcinoma	110	110	9	2	4
PRPF8	ENSG00000141510	TP53	breast	16	ductal carcinoma,ER-HER-positive carcinoma,ER-positive carcinoma,ER-PR-HER-positive carcinoma,ER-PR-positive carcinoma,adenoid cystic carcinoma,HER-positive carcinoma,lobular carcinoma,luminal NS carcinoma,medullary carcinoma,metaplastic carcinoma,neoplasm,phyllodes tumour,basal (triple-negative) carcinoma,carcinoma,carcinoma in situ	214	179	11	4	27
PTBP1	ENSG00000141510	TP53	breast	19	ductal carcinoma,ductolobular carcinoma,ER-HER-positive carcinoma,ER-positive carcinoma,ER-PR-HER-positive carcinoma,ER-PR-positive carcinoma,HER-positive carcinoma,hyperplasia,lobular carcinoma,luminal NS carcinoma,adenosis,medullary carcinoma,metaplastic carcinoma,neoplasm,phyllodes tumour,basal (triple-negative) carcinoma,acinic cell carcinoma,carcinoma,carcinoma in situ	475	471	10	3	11
RANGAP1	ENSG00000141510	TP53	breast	17	ductal carcinoma,ductolobular carcinoma,ER-HER-positive carcinoma,ER-positive carcinoma,ER-PR-HER-positive carcinoma,ER-PR-positive carcinoma,HER-positive carcinoma,lobular carcinoma,luminal B carcinoma,luminal NS carcinoma,medullary carcinoma,neoplasm,phyllodes tumour,basal (triple-negative) carcinoma,acinic cell carcinoma,carcinoma,carcinoma in situ	152	135	8	2	7
RBFOX2	ENSG00000141510	TP53	breast	2	phyllodes tumour,carcinoma	2	2	2	7	12
RBM10	ENSG00000141510	TP53	breast	7	ductal carcinoma,ER-PR-positive carcinoma,HER-positive carcinoma,phyllodes tumour,basal (triple-negative) carcinoma,carcinoma,carcinoma in situ	18	21	5	3	10
RNF219	ENSG00000141510	TP53	breast	5	ER-positive carcinoma,luminal NS carcinoma,phyllodes tumour,basal (triple-negative) carcinoma,carcinoma	5	6	2	1	1
RTCB	ENSG00000141510	TP53	breast	18	ductal carcinoma,ductolobular carcinoma,ER-HER-positive carcinoma,ER-positive carcinoma,ER-PR-HER-positive carcinoma,ER-PR-positive carcinoma,HER-positive carcinoma,hyperplasia,lobular carcinoma,luminal NS carcinoma,medullary carcinoma,metaplastic carcinoma,neoplasm,phyllodes tumour,basal (triple-negative) carcinoma,acinic cell carcinoma,carcinoma,carcinoma in situ	210	199	9	1	3
SF3A3	ENSG00000141510	TP53	breast	13	ductal carcinoma,ductolobular carcinoma,ER-HER-positive carcinoma,ER-positive carcinoma,ER-PR-positive carcinoma,HER-positive carcinoma,luminal NS carcinoma,medullary carcinoma,metaplastic carcinoma,neoplasm,phyllodes tumour,basal (triple-negative) carcinoma,carcinoma	83	76	9	2	9
SF3B4	ENSG00000141510	TP53	breast	9	ductal carcinoma,ER-positive carcinoma,HER-positive carcinoma,lobular carcinoma,luminal NS carcinoma,neoplasm,phyllodes tumour,basal (triple-negative) carcinoma,carcinoma	18	23	6	2	11
SMNDC1	ENSG00000141510	TP53	breast	19	ductal carcinoma,ductolobular carcinoma,ER-HER-positive carcinoma,ER-positive carcinoma,ER-PR-HER-positive carcinoma,ER-PR-positive carcinoma,HER-positive carcinoma,hyperplasia,lobular carcinoma,luminal B carcinoma,luminal NS carcinoma,medullary carcinoma,metaplastic carcinoma,neoplasm,phyllodes tumour,basal (triple-negative) carcinoma,acinic cell carcinoma,carcinoma,carcinoma in situ	190	186	11	4	9
SND1	ENSG00000141510	TP53	breast	8	ductal carcinoma,ER-PR-HER-positive carcinoma,HER-positive carcinoma,luminal NS carcinoma,metaplastic carcinoma,phyllodes tumour,basal (triple-negative) carcinoma,carcinoma	41	35	7	2	5
SRSF1	ENSG00000141510	TP53	breast	22	ductal carcinoma,ductolobular carcinoma,ER-HER-positive carcinoma,ER-positive carcinoma,ER-PR-HER-positive carcinoma,ER-PR-positive carcinoma,fibroadenoma,HER-positive carcinoma,hyperplasia,lobular carcinoma,luminal A carcinoma,luminal B carcinoma,luminal NS carcinoma,adenosis,medullary carcinoma,metaplastic carcinoma,neoplasm,phyllodes tumour,basal (triple-negative) carcinoma,acinic cell carcino…	678	638	11	11	29
SRSF10	ENSG00000141510	TP53	breast	2	phyllodes tumour,carcinoma	2	2	2	1	1
SRSF3	ENSG00000141510	TP53	breast	11	ductal carcinoma,ductolobular carcinoma,ER-positive carcinoma,ER-PR-positive carcinoma,HER-positive carcinoma,lobular carcinoma,metaplastic carcinoma,neoplasm,phyllodes tumour,basal (triple-negative) carcinoma,carcinoma	60	53	8	1	2
SRSF7	ENSG00000141510	TP53	breast	18	ductal carcinoma,ductolobular carcinoma,ER-HER-positive carcinoma,ER-positive carcinoma,ER-PR-HER-positive carcinoma,ER-PR-positive carcinoma,HER-positive carcinoma,lobular carcinoma,luminal B carcinoma,luminal NS carcinoma,medullary carcinoma,metaplastic carcinoma,neoplasm,phyllodes tumour,basal (triple-negative) carcinoma,acinic cell carcinoma,carcinoma,carcinoma in situ	313	306	10	3	6
SRSF9	ENSG00000141510	TP53	breast	22	ductal carcinoma,ductolobular carcinoma,ER-HER-positive carcinoma,ER-positive carcinoma,ER-PR-HER-positive carcinoma,ER-PR-positive carcinoma,fibroadenoma,HER-positive carcinoma,hyperplasia,lobular carcinoma,luminal A carcinoma,luminal B carcinoma,luminal NS carcinoma,adenosis,medullary carcinoma,metaplastic carcinoma,neoplasm,phyllodes tumour,basal (triple-negative) carcinoma,acinic cell carcino…	529	491	10	3	5
TIA1	ENSG00000141510	TP53	breast	7	ductal carcinoma,ER-positive carcinoma,medullary carcinoma,metaplastic carcinoma,phyllodes tumour,basal (triple-negative) carcinoma,carcinoma	28	26	6	1	2
TIAL1	ENSG00000141510	TP53	breast	2	phyllodes tumour,carcinoma	2	2	2	1	1
TRA2A	ENSG00000141510	TP53	breast	20	ductal carcinoma,ductolobular carcinoma,ER-positive carcinoma,ER-PR-HER-positive carcinoma,ER-PR-positive carcinoma,fibroadenoma,adenoid cystic carcinoma,HER-positive carcinoma,hyperplasia,lobular carcinoma,luminal A carcinoma,luminal NS carcinoma,medullary carcinoma,metaplastic carcinoma,neoplasm,phyllodes tumour,basal (triple-negative) carcinoma,acinic cell carcinoma,carcinoma,carcinoma in situ	289	276	11	1	3
TROVE2	ENSG00000141510	TP53	breast	6	ductal carcinoma,ER-positive carcinoma,metaplastic carcinoma,phyllodes tumour,basal (triple-negative) carcinoma,carcinoma	13	15	4	2	2
U2AF1	ENSG00000141510	TP53	breast	19	ductal carcinoma,ductolobular carcinoma,ER-HER-positive carcinoma,ER-positive carcinoma,ER-PR-HER-positive carcinoma,ER-PR-positive carcinoma,HER-positive carcinoma,hyperplasia,lobular carcinoma,luminal NS carcinoma,adenosis,medullary carcinoma,metaplastic carcinoma,neoplasm,phyllodes tumour,basal (triple-negative) carcinoma,acinic cell carcinoma,carcinoma,carcinoma in situ	282	277	10	4	11
U2AF2	ENSG00000141510	TP53	breast	20	ductal carcinoma,ductolobular carcinoma,ER-HER-positive carcinoma,ER-positive carcinoma,ER-PR-HER-positive carcinoma,ER-PR-positive carcinoma,HER-positive carcinoma,hyperplasia,lobular carcinoma,luminal B carcinoma,luminal NS carcinoma,adenosis,medullary carcinoma,metaplastic carcinoma,neoplasm,phyllodes tumour,basal (triple-negative) carcinoma,acinic cell carcinoma,carcinoma,carcinoma in situ	546	513	11	12	73
UPF1	ENSG00000141510	TP53	breast	6	ductal carcinoma,ER-PR-HER-positive carcinoma,metaplastic carcinoma,phyllodes tumour,basal (triple-negative) carcinoma,carcinoma	22	19	5	4	12
VIM	ENSG00000141510	TP53	breast	17	ductal carcinoma,ductolobular carcinoma,ER-HER-positive carcinoma,ER-positive carcinoma,ER-PR-HER-positive carcinoma,ER-PR-positive carcinoma,HER-positive carcinoma,hyperplasia,lobular carcinoma,luminal A carcinoma,adenosis,medullary carcinoma,metaplastic carcinoma,phyllodes tumour,basal (triple-negative) carcinoma,carcinoma,carcinoma in situ	154	149	9	2	5
YTHDC1	ENSG00000141510	TP53	breast	11	ductal carcinoma,ductolobular carcinoma,ER-positive carcinoma,HER-positive carcinoma,hyperplasia,lobular carcinoma,medullary carcinoma,phyllodes tumour,basal (triple-negative) carcinoma,acinic cell carcinoma,carcinoma	171	134	11	3	6
YTHDF1	ENSG00000141510	TP53	breast	9	ductal carcinoma,ER-PR-positive carcinoma,HER-positive carcinoma,lobular carcinoma,luminal NS carcinoma,medullary carcinoma,phyllodes tumour,basal (triple-negative) carcinoma,carcinoma	50	46	9	2	2
ZNF184	ENSG00000141510	TP53	breast	18	ductal carcinoma,ductolobular carcinoma,ER-HER-positive carcinoma,ER-positive carcinoma,ER-PR-HER-positive carcinoma,ER-PR-positive carcinoma,HER-positive carcinoma,hyperplasia,lobular carcinoma,luminal B carcinoma,luminal NS carcinoma,medullary carcinoma,metaplastic carcinoma,neoplasm,phyllodes tumour,basal (triple-negative) carcinoma,carcinoma,carcinoma in situ	202	188	10	2	5
